# Supplementary material for: Enzyme Replacement Therapy Can Reverse Pathogenic Cascade in Pompe Disease
Source: PubMed Central journal article supplement (PMC7334420; doi:10.1016/j.omtm.2020.05.026), 2020-06-10
Supplement: mmc1.pdf [file mmc1.pdf]

**OMTM, Volume 18**

**Supplemental Information**

**Enzyme Replacement Therapy Can Reverse  
Pathogenic Cascade in Pompe Disease**

**Naresh Kumar Meena, Evelyn Ralston, Nina Raben, and Rosa Puertollano**

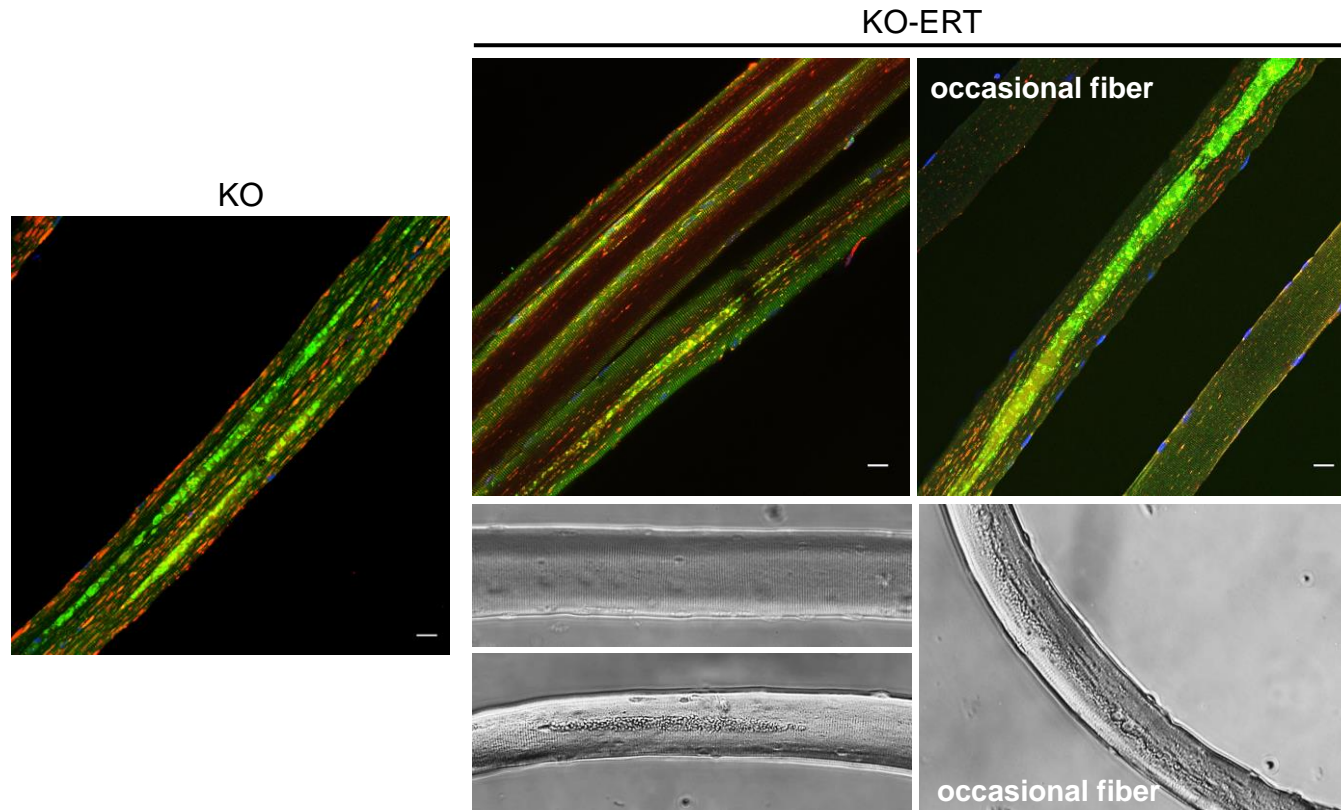

**Figure S1. Additional images of muscle fibers from untreated- and treated KO mice.**

Confocal microscopy images of single muscle fibers immunostained with lysosomal marker LAMP1 (red) and autophagosomal marker LC3 (green); nuclei are stained with Hoechst dye (blue). Virtually all muscle fibers (the white part of gastrocnemius) from 9-month-old untreated KO contain large areas of autophagic buildup often spanning the whole length of the fibers. Most fibers from 9-month-old treated KO mice (the animals received 11 bi-weekly i.v. administrations of AT-GAA as described in the main text) are free from autophagic buildup, whereas ~16% fibers contain autophagic buildup of smaller size, and only occasional fibers contain autophagic buildup of the size as the one seen in untreated KO mice. Autophagic buildup can also be detected by bright-field microscopy or differential interference contrast microscopy. Bar: 20  $\mu$ m.

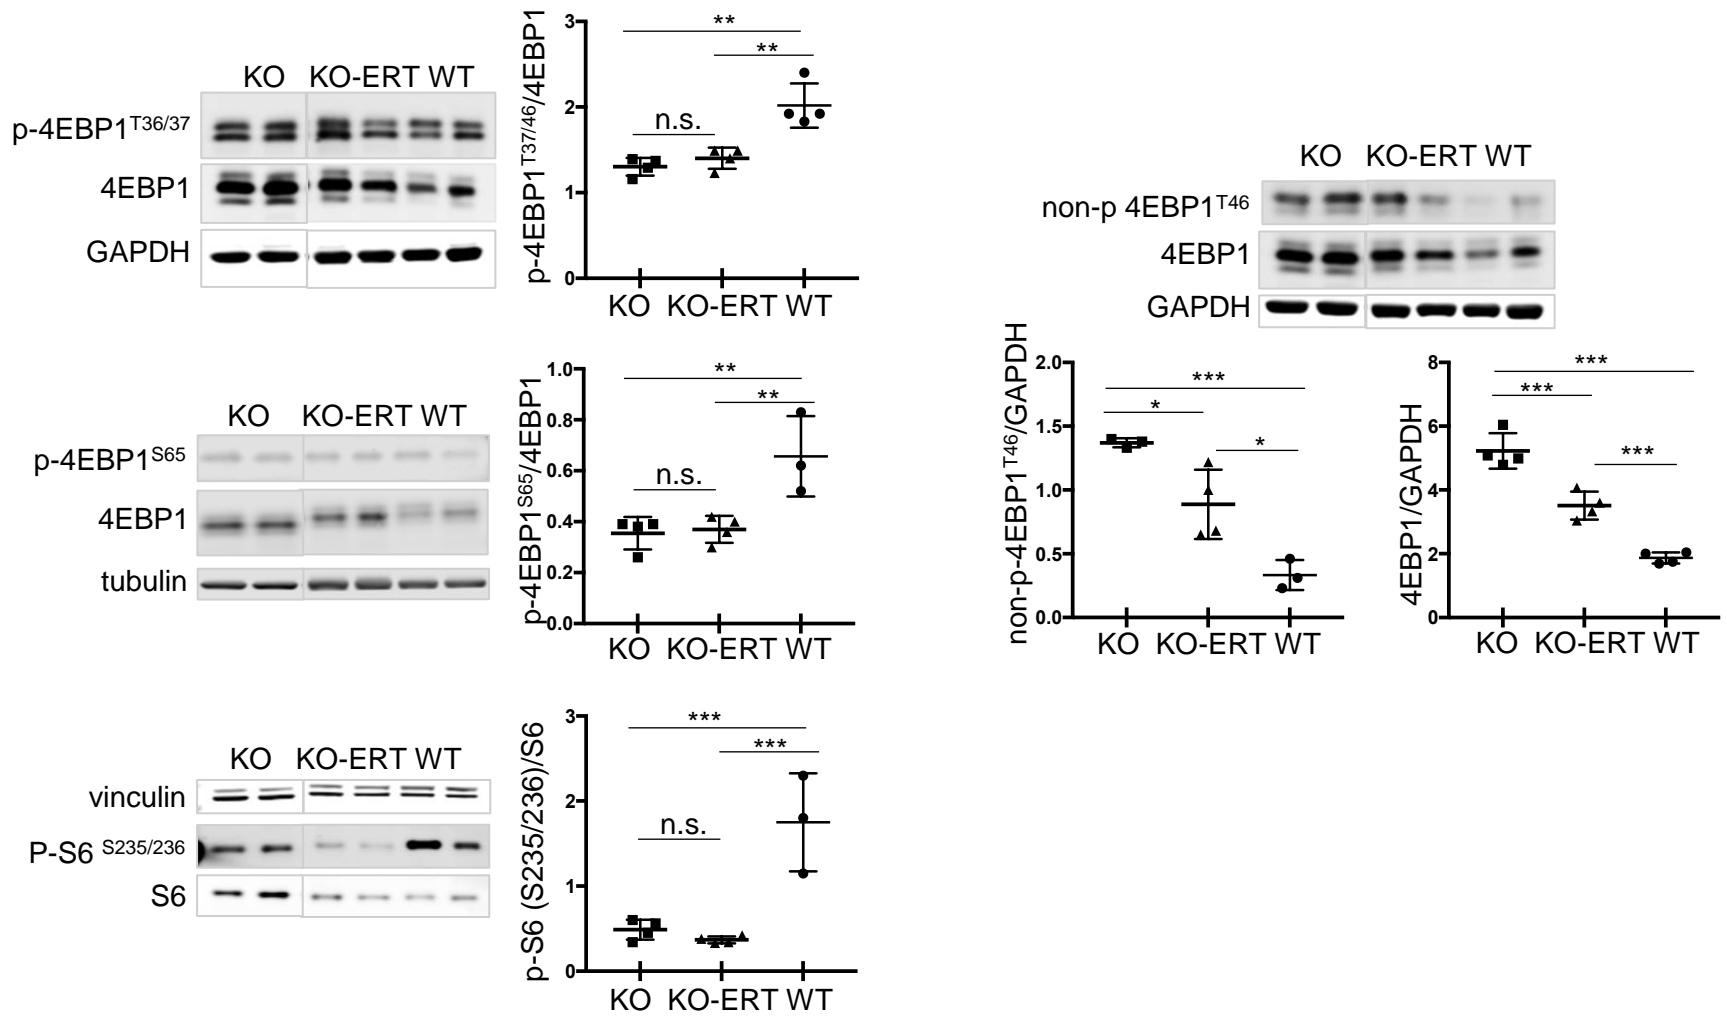

**Figure S2. The effect of AT-GAA on mTORC1 signaling following a short-term regimen.** KO mice (3-4- month-old) received 4 bi-weekly i.v. administrations of AT-GAA as described in the main text. Age and sex-matched WT and untreated KO mice were used for the comparisons. Skeletal muscle biopsies (the white part of gastrocnemius) were collected 14 days after the last administration. Western blot analysis of muscle lysates from WT, untreated KO (KO), and treated KO (KO-ERT) mice with indicated antibodies (n=3-4 for each group). Different forms of 4EBP1, phosphorylated (p-4EBP1<sup>T37/46</sup> and p-4EBP1<sup>S65</sup>), non-phosphorylated (non-p-4EBP1<sup>T46</sup>) and total were analyzed. Similar to what was found after 11 i.v. administrations of AT-GAA, no changes in the mTOR activity are detected in treated compared to untreated KO samples. Again, similar to what was found after 11 i.v. administrations of AT-GAA, a decrease in both non-p-4EBP1<sup>T46</sup> and total is seen in treated compared to untreated KO muscle GAPDH and vinculin were used as loading controls. Each data point represents an individual mouse. Statistical significance was determined by one-way ANOVA. Graphs represent mean  $\pm$  SD. \* $P < 0.05$ ; \*\* $P < 0.01$ ; \*\*\* $P < 0.001$ .

10 day-old

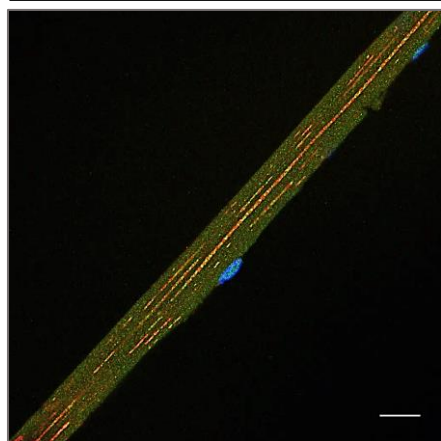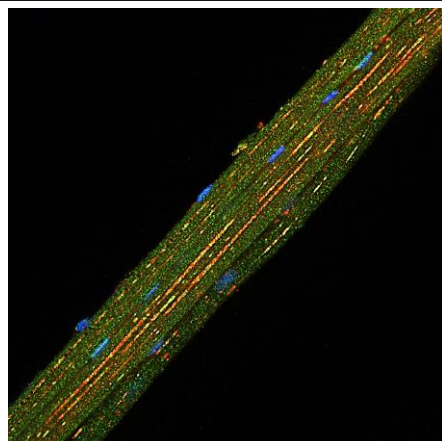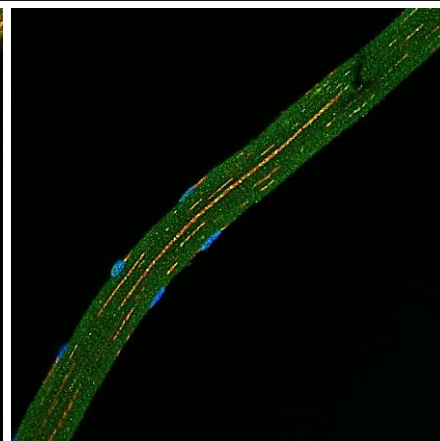

6-week-old

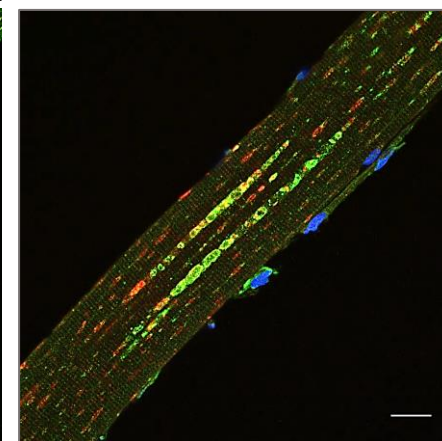

**Figure S3. Autophagic buildup in KO muscle can be detected as early as in 10-day-old animals.** Confocal microscopy images of single muscle fibers immunostained with lysosomal marker LAMP1 (red) and autophagosomal marker LC3 (green); nuclei are stained with Hoechst dye (blue). The fibers are isolated from muscle (the white part of gastrocnemius) derived from 10-day-old and 6-week-old mice. Bar: 20  $\mu$ m.

**Video S1.** Confocal microscopy images of serial optical sections taken from two adjacent KO muscle fibers stained with lysosomal marker LAMP1 (red) and autophagosomal marker LC3 (green). The images show the extent of the autophagic buildup in fibers derived from untreated KO mice. Note, that the buildup in the left fiber surfaces before that in the right fiber, indicating that these structures belong to different focal planes along the Z stack. It is therefore clear that the autophagic buildup can be easily missed on routine histology of longitudinal sections of the diseased skeletal muscle.

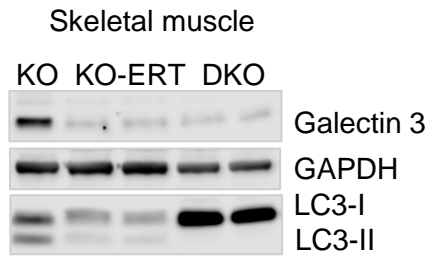

Raw data for Figure 5C

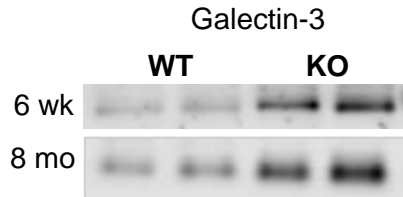

(referred to as "not shown"  
in the main text)

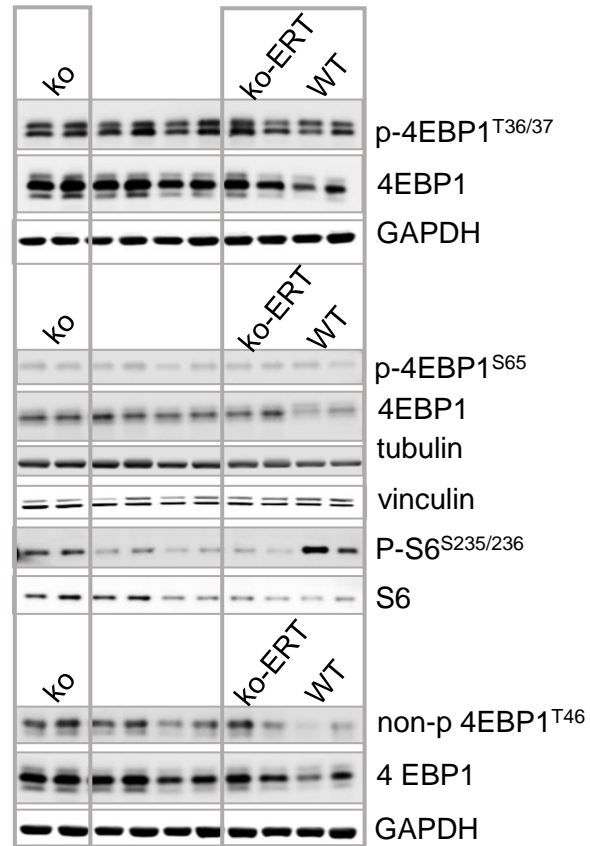

Raw data for Supplemental Figure S2

**Supplemental Table 1: Absolute Concentration of 116 Compounds**

| HMT DB |                            | Concentration (nmol/g) |       |       |       |        |       | Comparative Analysis |                      |                    |                      |
|--------|----------------------------|------------------------|-------|-------|-------|--------|-------|----------------------|----------------------|--------------------|----------------------|
| ID     | Compound name              | KO-Treatment           |       | KO    |       | WT     |       | KO-Treatment vs KO   |                      | KO vs WT           |                      |
|        |                            | Mean                   | S.D.  | Mean  | S.D.  | Mean   | S.D.  | Ratio <sup>†</sup>   | p-value <sup>‡</sup> | Ratio <sup>†</sup> | p-value <sup>‡</sup> |
| A_0001 | NAD <sup>+</sup>           | 479                    | 74    | 548   | 19    | 485    | 61    | 0.9                  | 0.071                | 1.1                | 0.052                |
| A_0002 | cAMP                       | 0.9                    | 0.3   | 1.0   | 0.2   | 0.9    | 0.2   | 0.9                  | 0.676                | 1.1                | 0.621                |
| A_0003 | cGMP                       | N.A.                   | N.A.  | 0.02  | 0.002 | N.A.   | N.A.  | <1                   | N.A.                 | <1                 | N.A.                 |
| A_0004 | NADH                       | 9.6                    | 0.7   | 11    | 1.5   | 9.4    | 1.0   | 0.9                  | 0.223                | 1.1                | 0.147                |
| A_0005 | Xanthine                   | 1.1                    | 0.3   | 1.8   | 1.0   | 0.4    | 0.3   | 0.6                  | 0.159                | 4.2                | 0.021 *              |
| A_0006 | ADP-ribose                 | 8.1                    | 5.9   | 8.9   | 2.6   | 5.9    | 2.5   | 0.9                  | 0.780                | 1.5                | 0.069                |
| A_0007 | Mevalonic acid             | N.A.                   | N.A.  | N.A.  | N.A.  | N.A.   | N.A.  | N.A.                 | N.A.                 | N.A.               | N.A.                 |
| A_0008 | UDP-glucose                | 18                     | 5.7   | 24    | 1.2   | 15     | 6.6   | 0.8                  | 0.052                | 1.6                | 0.023 *              |
| A_0009 | Uric acid                  | 2.9                    | 0.7   | 4.7   | 1.8   | 2.5    | 1.2   | 0.6                  | 0.065                | 1.9                | 0.036 *              |
| A_0010 | NADP <sup>+</sup>          | 12                     | 2.1   | 17    | 1.3   | 11     | 1.3   | 0.7                  | 0.001 **             | 1.6                | 7.0E-06 ***          |
| A_0011 | IMP                        | 78                     | 20    | 98    | 32    | 158    | 79    | 0.8                  | 0.235                | 0.6                | 0.131                |
| A_0012 | Sedoheptulose 7-phosphate  | N.A.                   | N.A.  | N.A.  | N.A.  | N.A.   | N.A.  | N.A.                 | N.A.                 | N.A.               | N.A.                 |
| A_0013 | Glucose 6-phosphate        | 1,427                  | 372   | 1,343 | 217   | 1,765  | 271   | 1.1                  | 0.643                | 0.8                | 0.015 *              |
| A_0014 | Fructose 6-phosphate       | 623                    | 157   | 528   | 93    | 777    | 106   | 1.2                  | 0.241                | 0.7                | 0.002 **             |
| A_0015 | Fructose 1-phosphate       | N.A.                   | N.A.  | N.A.  | N.A.  | N.A.   | N.A.  | N.A.                 | N.A.                 | N.A.               | N.A.                 |
| A_0016 | Galactose 1-phosphate      | 5.6                    | 1.3   | 8.2   | 2.7   | 2.9    | 1.1   | 0.7                  | 0.070                | 2.8                | 0.003 **             |
| A_0017 | Glucose 1-phosphate        | 166                    | 70    | 146   | 27    | 228    | 54    | 1.1                  | 0.526                | 0.6                | 0.011 *              |
| A_0018 | Acetoacetyl CoA            | N.A.                   | N.A.  | N.A.  | N.A.  | N.A.   | N.A.  | N.A.                 | N.A.                 | N.A.               | N.A.                 |
| A_0019 | Acetyl CoA                 | 0.4                    | 0.2   | 0.6   | 0.2   | 0.4    | 0.14  | 0.7                  | 0.085                | 1.7                | 0.033 *              |
| A_0020 | Folic acid                 | N.A.                   | N.A.  | N.A.  | N.A.  | N.A.   | N.A.  | N.A.                 | N.A.                 | N.A.               | N.A.                 |
| A_0021 | Ribose 5-phosphate         | 2.6                    | 1.7   | 4.3   | 1.7   | 2.4    | 0.9   | 0.6                  | 0.109                | 1.8                | 0.041 *              |
| A_0022 | CoA                        | 1.8                    | 0.7   | 2.2   | 0.6   | 2.7    | 1.2   | 0.8                  | 0.305                | 0.8                | 0.351                |
| A_0023 | Ribose 1-phosphate         | 4.7                    | 0.9   | 7.6   | 2.5   | 3.5    | 2.1   | 0.6                  | 0.033 *              | 2.2                | 0.012 *              |
| A_0024 | Ribulose 5-phosphate       | 8.3                    | 5.3   | 10    | 2.1   | 7.7    | 5.4   | 0.8                  | 0.439                | 1.3                | 0.318                |
| A_0025 | Xylulose 5-phosphate       | N.A.                   | N.A.  | N.A.  | N.A.  | N.A.   | N.A.  | N.A.                 | N.A.                 | N.A.               | N.A.                 |
| A_0026 | Erythrose 4-phosphate      | N.A.                   | N.A.  | N.A.  | N.A.  | N.A.   | N.A.  | N.A.                 | N.A.                 | N.A.               | N.A.                 |
| A_0027 | HMG CoA                    | 0.3                    | 0.008 | 0.4   | 0.04  | 0.3    | 0.006 | 0.9                  | 0.308                | 1.1                | 0.615                |
| A_0028 | Glyceraldehyde 3-phosphate | 4.2                    | 3.5   | 13    | 7.6   | 5.2    | 6.7   | 0.3                  | 0.038 *              | 2.5                | 0.089                |
| A_0029 | NADPH                      | 5.8                    | 0.2   | 5.9   | 0.4   | 6.3    | 0.3   | 1.0                  | 0.611                | 0.9                | 0.069                |
| A_0030 | Malonyl CoA                | 0.5                    | 0.2   | 0.7   | 0.13  | 0.5    | 0.05  | 0.7                  | 0.102                | 1.4                | 0.012 *              |
| A_0031 | Phosphocreatine            | 2,234                  | 331   | 2,182 | 142   | 1,997  | 361   | 1.0                  | 0.738                | 1.1                | 0.282                |
| A_0032 | XMP                        | 0.12                   | 0.02  | 0.3   | 0.04  | 0.11   | 0.02  | 0.4                  | 3.4E-05 ***          | 3.0                | 1.7E-05 ***          |
| A_0033 | Dihydroxyacetone phosphate | 153                    | 68    | 254   | 67    | 246    | 109   | 0.6                  | 0.027 *              | 1.0                | 0.877                |
| A_0034 | Adenylosuccinic acid       | 1.9                    | 0.4   | 2.8   | 1.1   | 2.2    | 1.2   | 0.7                  | 0.113                | 1.2                | 0.429                |
| A_0035 | Fructose 1,6-diphosphate   | 353                    | 205   | 469   | 110   | 635    | 482   | 0.8                  | 0.258                | 0.7                | 0.443                |
| A_0036 | 6-Phosphogluconic acid     | 2.4                    | 0.5   | 2.9   | 0.4   | 3.6    | 1.7   | 0.8                  | 0.093                | 0.8                | 0.387                |
| A_0037 | N-Carbamoylaspartic acid   | 0.07                   | 0.03  | 0.11  | 0.03  | 0.10   | 0.04  | 0.6                  | 0.018 *              | 1.2                | 0.451                |
| A_0038 | PRPP                       | 17                     | 5.0   | 19    | 6.7   | 23     | 9.4   | 0.9                  | 0.631                | 0.8                | 0.351                |
| A_0039 | 2-Phosphoglyceric acid     | 3.3                    | 0.8   | 3.0   | 0.6   | 2.9    | 0.9   | 1.1                  | 0.510                | 1.0                | 0.851                |
| A_0040 | 2,3-Diphosphoglyceric acid | 1.1                    | 0.2   | 2.2   | 1.0   | 0.8    | 0.07  | 0.5                  | 0.033 *              | 2.7                | 0.018 *              |
| A_0041 | 3-Phosphoglyceric acid     | 33                     | 5.7   | 30    | 5.9   | 29     | 6.7   | 1.1                  | 0.293                | 1.0                | 0.760                |
| A_0042 | Phosphoenolpyruvic acid    | 6.9                    | 1.0   | 2.8   | 1.6   | 4.4    | 1.3   | 2.5                  | 7.1E-04 ***          | 0.6                | 0.083                |
| A_0043 | GMP                        | 1.6                    | 0.3   | 2.3   | 0.14  | 1.5    | 0.4   | 0.7                  | 0.001 **             | 1.6                | 0.003 **             |
| A_0044 | AMP                        | 4.9                    | 1.2   | 5.8   | 2.6   | 4.3    | 2.2   | 0.8                  | 0.463                | 1.4                | 0.294                |
| A_0045 | 2-Oxoisovaleric acid       | 4.9                    | 1.2   | 5.0   | 0.5   | 7.7    | 2.1   | 1.0                  | 0.860                | 0.7                | 0.045 *              |
| A_0046 | GDP                        | 3.9                    | 0.7   | 4.0   | 0.8   | 2.8    | 0.7   | 1.0                  | 0.802                | 1.4                | 0.023 *              |
| A_0047 | Lactic acid                | 8,907                  | 2,165 | 7,436 | 1,410 | 10,282 | 2,374 | 1.2                  | 0.198                | 0.7                | 0.035 *              |
| A_0048 | ADP                        | 187                    | 106   | 144   | 56    | 124    | 63    | 1.3                  | 0.400                | 1.2                | 0.572                |
| A_0049 | GTP                        | 128                    | 6.9   | 151   | 3.5   | 111    | 6.1   | 0.8                  | 1.0E-04 ***          | 1.4                | 6.2E-07 ***          |
| A_0050 | Glyoxylate                 | N.A.                   | N.A.  | N.A.  | N.A.  | N.A.   | N.A.  | N.A.                 | N.A.                 | N.A.               | N.A.                 |
| A_0051 | ATP                        | 7,934                  | 249   | 7,167 | 188   | 8,122  | 216   | 1.1                  | 1.7E-04 ***          | 0.9                | 1.1E-05 ***          |
| A_0052 | Glycerol 3-phosphate       | 319                    | 108   | 336   | 71    | 391    | 98    | 0.9                  | 0.746                | 0.9                | 0.293                |
| A_0053 | Glycolic acid              | N.A.                   | N.A.  | N.A.  | N.A.  | 47     | 8.2   | N.A.                 | N.A.                 | <1                 | N.A.                 |
| A_0054 | Pyruvic acid               | 55                     | 18    | 45    | 17    | 63     | 28    | 1.2                  | 0.354                | 0.7                | 0.208                |
| A_0055 | N-Acetylglutamic acid      | 2.6                    | 0.04  | 2.8   | 0.2   | 2.7    | 0.3   | 1.0                  | 0.196                | 1.0                | 0.499                |
| A_0056 | 2-Hydroxyglutaric acid     | 3.6                    | 1.0   | 5.3   | 1.2   | 20     | 2.0   | 0.7                  | 0.026 *              | 0.3                | 3.3E-07 ***          |
| A_0057 | Carbamoylphosphate         | N.A.                   | N.A.  | N.A.  | N.A.  | N.A.   | N.A.  | N.A.                 | N.A.                 | N.A.               | N.A.                 |
| A_0058 | Succinic acid              | 157                    | 49    | 232   | 82    | 142    | 42    | 0.7                  | 0.093                | 1.6                | 0.046 *              |
| A_0059 | Malic acid                 | 168                    | 59    | 241   | 99    | 175    | 51    | 0.7                  | 0.161                | 1.4                | 0.188                |
| A_0060 | 2-Oxoglutaric acid         | N.A.                   | N.A.  | N.A.  | N.A.  | N.A.   | N.A.  | N.A.                 | N.A.                 | N.A.               | N.A.                 |

ID consists of analysis mode and number. 'C' and 'A' showed cation and anion modes, respectively.

N.D. (Not Detected): The target peak or metabolite was below detection limits.

N.A. (Not Available): The calculation was impossible because of insufficiency of the data.

<sup>†</sup>The ratio is of computed by using averaged detection values. The latter was used as denominator.

<sup>‡</sup>The p-value is computed by Welch's t-test. (\*<0.05, \*\*<0.01, \*\*\*<0.001)

The data are sorted by ID in ascending order.

**Supplemental Table 1: Absolute Concentration of 116 Compounds**

| HMT DB |                        | Concentration (nmol/g) |       |        |       |        |       | Comparative Analysis |                      |                    |                      |
|--------|------------------------|------------------------|-------|--------|-------|--------|-------|----------------------|----------------------|--------------------|----------------------|
| ID     | Compound name          | KO-Treatment           |       | KO     |       | WT     |       | KO-Treatment vs KO   |                      | KO vs WT           |                      |
|        |                        | Mean                   | S.D.  | Mean   | S.D.  | Mean   | S.D.  | Ratio <sup>†</sup>   | p-value <sup>‡</sup> | Ratio <sup>†</sup> | p-value <sup>‡</sup> |
| A_0061 | Fumaric acid           | 62                     | 17    | 106    | 31    | 59     | 15    | 0.6                  | 0.018 *              | 1.8                | 0.013 *              |
| A_0062 | Citric acid            | 159                    | 21    | 233    | 26    | 161    | 18    | 0.7                  | 3.4E-04 ***          | 1.4                | 3.8E-04 ***          |
| A_0063 | cis-Aconitic acid      | 1.5                    | 0.4   | 2.2    | 0.5   | 1.5    | 0.2   | 0.7                  | 0.020 *              | 1.5                | 0.016 *              |
| A_0064 | Isocitric acid         | N.A.                   | N.A.  | N.A.   | N.A.  | N.A.   | N.A.  | N.A.                 | N.A.                 | N.A.               | N.A.                 |
| C_0001 | Urea                   | 5,551                  | 1,006 | 4,799  | 857   | 6,610  | 1,046 | 1.2                  | 0.194                | 0.7                | 0.009 **             |
| C_0002 | Gly                    | 1,601                  | 98    | 1,502  | 323   | 2,142  | 249   | 1.1                  | 0.501                | 0.7                | 0.004 **             |
| C_0003 | Putrescine             | 0.2                    | 0.3   | 1.0    | 0.4   | 0.9    | 0.4   | 0.2                  | 0.080                | 1.1                | 0.686                |
| C_0004 | β-Ala                  | 13                     | 1.4   | 14     | 1.2   | 27     | 2.6   | 1.0                  | 0.490                | 0.5                | 1.1E-05 ***          |
| C_0005 | Sarcosine              | 12                     | 3.3   | 13     | 3.5   | 13     | 2.0   | 0.9                  | 0.836                | 1.0                | 0.978                |
| C_0006 | Ala                    | 2,150                  | 323   | 2,119  | 349   | 1,397  | 256   | 1.0                  | 0.875                | 1.5                | 0.003 **             |
| C_0007 | γ-Aminobutyric acid    | N.A.                   | N.A.  | N.A.   | N.A.  | N.A.   | N.A.  | N.A.                 | N.A.                 | N.A.               | N.A.                 |
| C_0008 | N,N-Dimethylglycine    | 4.8                    | 1.0   | 5.4    | 1.4   | 4.6    | 0.6   | 0.9                  | 0.536                | 1.2                | 0.409                |
| C_0009 | Choline                | 41                     | 23    | 23     | 17    | N.A.   | N.A.  | 1.8                  | 0.214                | <                  | N.A.                 |
| C_0010 | Ser                    | 275                    | 25    | 252    | 51    | 224    | 28    | 1.1                  | 0.353                | 1.1                | 0.277                |
| C_0011 | Carnosine              | 616                    | 62    | 529    | 14    | 1,859  | 90    | 1.2                  | 0.017 *              | 0.3                | 1.9E-07 ***          |
| C_0012 | Creatinine             | 59                     | 9.6   | 45     | 4.2   | 58     | 2.8   | 1.3                  | 0.012 *              | 0.8                | 1.6E-04 ***          |
| C_0013 | Pro                    | 86                     | 29    | 57     | 24    | 59     | 14    | 1.5                  | 0.103                | 1.0                | 0.898                |
| C_0014 | Betaine                | 34                     | 6.8   | 31     | 25    | 11     | 7.9   | 1.1                  | 0.744                | 2.9                | 0.109                |
| C_0015 | Val                    | 205                    | 49    | 167    | 35    | 186    | 28    | 1.2                  | 0.153                | 0.9                | 0.300                |
| C_0016 | Thr                    | 219                    | 37    | 208    | 37    | 192    | 27    | 1.1                  | 0.590                | 1.1                | 0.440                |
| C_0017 | Homoserine             | N.A.                   | N.A.  | N.A.   | N.A.  | N.A.   | N.A.  | N.A.                 | N.A.                 | N.A.               | N.A.                 |
| C_0018 | Betaine aldehyde       | N.A.                   | N.A.  | N.A.   | N.A.  | N.A.   | N.A.  | N.A.                 | N.A.                 | N.A.               | N.A.                 |
| C_0019 | Cys                    | N.A.                   | N.A.  | N.A.   | N.A.  | N.A.   | N.A.  | N.A.                 | N.A.                 | N.A.               | N.A.                 |
| C_0020 | Hydroxyproline         | 88                     | 23    | 35     | 15    | 165    | 23    | 2.5                  | 0.001 **             | 0.2                | 1.8E-06 ***          |
| C_0021 | Creatine               | 16,237                 | 1,323 | 16,165 | 1,010 | 16,769 | 2,025 | 1.0                  | 0.919                | 1.0                | 0.534                |
| C_0022 | Leu                    | 149                    | 41    | 136    | 33    | 105    | 15    | 1.1                  | 0.565                | 1.3                | 0.079                |
| C_0023 | Ile                    | 95                     | 23    | 78     | 19    | 73     | 11    | 1.2                  | 0.207                | 1.1                | 0.583                |
| C_0024 | Asn                    | 65                     | 18    | 76     | 22    | 45     | 5.6   | 0.9                  | 0.373                | 1.7                | 0.018 *              |
| C_0025 | Ornithine              | 37                     | 5.2   | 31     | 6.2   | 26     | 2.9   | 1.2                  | 0.085                | 1.2                | 0.106                |
| C_0026 | Asp                    | 368                    | 61    | 437    | 135   | 223    | 34    | 0.8                  | 0.288                | 2.0                | 0.010 *              |
| C_0027 | Homocysteine           | N.A.                   | N.A.  | N.A.   | N.A.  | N.A.   | N.A.  | N.A.                 | N.A.                 | N.A.               | N.A.                 |
| C_0028 | Adenine                | 3.1                    | 0.5   | 3.4    | 0.8   | 3.0    | 0.3   | 0.9                  | 0.551                | 1.1                | 0.331                |
| C_0029 | Hypoxanthine           | N.A.                   | N.A.  | 9.9    | N.A.  | N.A.   | N.A.  | <                    | N.A.                 | <                  | N.A.                 |
| C_0030 | Spermidine             | 1.1                    | 0.3   | 2.2    | 0.8   | 2.6    | 0.7   | 0.5                  | 0.024 *              | 0.8                | 0.356                |
| C_0031 | Gln                    | 2,036                  | 95    | 2,289  | 260   | 1,742  | 232   | 0.9                  | 0.064                | 1.3                | 0.003 **             |
| C_0032 | Lys                    | 1,458                  | 163   | 1,601  | 537   | 596    | 172   | 0.9                  | 0.555                | 2.7                | 0.005 **             |
| C_0033 | Glu                    | 767                    | 241   | 1,041  | 290   | 726    | 182   | 0.7                  | 0.106                | 1.4                | 0.053                |
| C_0034 | Met                    | 57                     | 4.4   | 52     | 9.6   | 56     | 7.7   | 1.1                  | 0.314                | 0.9                | 0.445                |
| C_0035 | Guanine                | N.A.                   | N.A.  | N.A.   | N.A.  | N.A.   | N.A.  | N.A.                 | N.A.                 | N.A.               | N.A.                 |
| C_0036 | His                    | 189                    | 22    | 173    | 22    | 140    | 13    | 1.1                  | 0.227                | 1.2                | 0.011 *              |
| C_0037 | Carnitine              | 415                    | 28    | 419    | 49    | 292    | 29    | 1.0                  | 0.858                | 1.4                | 5.7E-04 ***          |
| C_0038 | Phe                    | 84                     | 17    | 76     | 9.9   | 73     | 9.4   | 1.1                  | 0.317                | 1.0                | 0.648                |
| C_0039 | Arg                    | 379                    | 56    | 456    | 70    | 185    | 55    | 0.8                  | 0.063                | 2.5                | 3.0E-05 ***          |
| C_0040 | Citrulline             | 113                    | 6.5   | 114    | 13    | 93     | 11    | 1.0                  | 0.876                | 1.2                | 0.011 *              |
| C_0041 | Tyr                    | 69                     | 11    | 65     | 6.7   | 83     | 11    | 1.1                  | 0.445                | 0.8                | 0.006 **             |
| C_0042 | S-Adenosylhomocysteine | 4.2                    | 0.3   | 4.2    | 0.4   | 4.6    | 0.2   | 1.0                  | 0.882                | 0.9                | 0.207                |
| C_0043 | Spermine               | 2.7                    | 0.3   | 2.7    | 0.12  | 2.3    | 0.2   | 1.0                  | 0.958                | 1.2                | 0.147                |
| C_0044 | Trp                    | 25                     | 3.3   | 28     | 4.6   | 29     | 2.8   | 0.9                  | 0.239                | 1.0                | 0.707                |
| C_0045 | Cystathionine          | N.A.                   | N.A.  | N.A.   | N.A.  | N.A.   | N.A.  | N.A.                 | N.A.                 | N.A.               | N.A.                 |
| C_0046 | Adenosine              | 9.3                    | 3.7   | 11     | 4.2   | 6.1    | 1.8   | 0.8                  | 0.434                | 1.8                | 0.031 *              |
| C_0047 | Inosine                | 14                     | 2.9   | 27     | 7.5   | 13     | 2.5   | 0.5                  | 0.006 **             | 2.1                | 0.004 **             |
| C_0048 | Guanosine              | 2.0                    | 0.2   | 2.4    | 0.2   | N.A.   | N.A.  | 0.8                  | 0.017 *              | <                  | N.A.                 |
| C_0049 | Argininosuccinic acid  | 5.1                    | 0.6   | 6.7    | 1.2   | 3.8    | 0.2   | 0.8                  | 0.020 *              | 1.8                | 0.002 **             |
| C_0050 | Glutathione (GSSG)     | 335                    | 52    | 399    | 88    | 234    | 81    | 0.8                  | 0.164                | 1.7                | 0.007 **             |
| C_0051 | Glutathione (GSH)      | 299                    | 96    | 300    | 111   | 376    | 146   | 1.0                  | 0.992                | 0.8                | 0.332                |
| C_0052 | S-Adenosylmethionine   | 22                     | 0.7   | 26     | 2.2   | 20     | 0.7   | 0.9                  | 0.007 **             | 1.3                | 7.5E-04 ***          |

ID consists of analysis mode and number. 'C' and 'A' showed cation and anion modes, respectively.  
 N.D. (Not Detected): The target peak or metabolite was below detection limits.  
 N.A. (Not Available): The calculation was impossible because of insufficiency of the data.  
<sup>†</sup>The ratio is computed by using averaged detection values. The latter was used as denominator.  
<sup>‡</sup>The p-value is computed by Welch's t-test. (\*<0.05, \*\*<0.01, \*\*\*<0.001)  
 The data are sorted by ID in ascending order.
